# Supplementary material for: Landscape predictors influencing livestock depredation by leopards in and around Annapurna Conservation Area, Nepal
Source: PeerJ. 2023 Dec 13;11:e16516. doi: 10.7717/peerj.16516 (PMC10725174; doi:10.7717/peerj.16516)
Supplement: Supplemental Information 2 [file peerj-11-16516-s002.xlsx]

## Sheet: Sheet1
S.N	X	Y	Year	Time	Month	Season	Livestock Lossses
1	230816	3135906	2018	12-4 AM	December	Winter
2	230150	3135725	2018	8-12 AM	November	Winter
3	230860	3137009	2018	12-4 PM	June	Summer
4	230049	3136506	2018	12-4 PM	July	Monsoon
5	231909	3136817	2018	4-8 PM	December	Winter
6	229730	3136856	2018	4-8 AM	January	Winter
7	231238	3136904	2018	12-4 PM	April	Summer
8	232420	3139260	2018	12-4 AM	Feburary	Winter
9	231880	3139563	2018	4-8 PM	December	Winter
10	232185	3139528	2018	4-8 AM	May	Summer
11	771133	3146246	2018	12-4 AM	June	Summer
12	770945	3144368	2018	12-4 AM	December	Winter
13	771851	3141515	2018	8-12 AM	August	Monsoon
14	772996	3139551	2018	12-4 PM	August	Monsoon
15	777630	3142142	2018	12-4 PM	January	Winter
16	777620	3141902	2018	12-4 PM	May	Summer
17	781167	3138881	2018	12-4 AM	Feburary	Winter
18	781260	3138928	2018	4-8 PM	April	Summer
19	700336	3126106	2018	12-4 AM	December	Winter
20	781352	3144775	2018	8-12 AM	September	Monsoon
21	781261	3137234	2018	4-8 PM	December	Winter
22	742382	3139825	2018	4-8 PM	October	Monsoon
23	742382	3139777	2018	12-4 AM	August	Monsoon
24	742417	3139753	2018	4-8 PM	July	Monsoon
25	742382	3139705	2018	4-8 PM	January	Winter
26	738318	3141292	2018	4-8 PM	September	Monsoon
27	747315	3140740	2018	4-8 PM	April	Summer
28	741790	3141805	2018	4-8 PM	March	Summer
29	741929	3141881	2018	12-4 AM	August	Monsoon
30	733228	3142653	2018	12-4 AM	March	Summer
31	792598	3127327	2018	8-12 AM	December	Winter
32	794329	3117734	2018	4-8 PM	October	Monsoon
33	793829	3118055	2018	12-4 PM	April	Summer
34	786150	3134180	2018	12-4 AM	June	Summer
35	214521	3127800	2018	8-12 AM	June	Summer
36	216412	3113777	2018	4-8 PM	May	Summer
37	792602	3119139	2018	12-4 PM	Feburary	Winter
38	790924	3127409	2018	4-8 PM	September	Monsoon
39	216557	3116223	2018	8 PM-12 AM	October	Monsoon
40	793871	3118107	2018	4-8 PM	April	Summer
41	212849	3125513	2018	8-12 AM	November	Winter
42	216235	3140615	2018	8 PM-12 AM	July	Monsoon
43	216157	3140058	2018	4-8 PM	August	Monsoon
44	216889	3137203	2018	8-12 AM	October	Monsoon
45	782397	3136177	2018	8 PM-12 AM	May	Summer
46	212766	3132237	2018	4-8 PM	July	Monsoon
47	783757	3137338	2018	12-4 AM	June	Summer
48	778687	3125556	2018	8 PM-12 AM	June	Summer
49	782470	3144373	2018	12-4 PM	March	Summer
50	776071	3141795	2018	12-4 AM	December	Winter
51	249715	3110544	2018	8 PM-12 AM	October	Monsoon
52	227004	3118750	2018	12-4 PM	January	Winter
53	241011	3123032	2018	12-4 AM	August	Monsoon
54	247724	3119262	2018	12-4 AM	November	Winter
55	241491	3125479	2018	12-4 AM	March	Summer
56	240143	3125482	2018	12-4 PM	Feburary	Winter
57	248285	3118143	2018	12-4 PM	April	Summer
58	243567	3121327	2018	12-4 AM	May	Summer
59	242776	3125161	2018	12-4 AM	Feburary	Winter
60	242355	3125518	2018	12-4 PM	June	Summer
61	241911	3125870	2018	8 PM-12 AM	April	Summer
62	241980	3126707	2018	8 PM-12 AM	May	Summer
63	234879	3128347	2018	12-4 PM	September	Monsoon
64	251243	3131864	2018	12-4 PM	August	Monsoon
65	247191	3119586	2018		Feburary	Winter
66	259591	3114355	2019	12-4 AM	January	Winter
67	256886	3116577	2019	12-4 PM	December	Winter
68	229710	3117520	2019	12-4 AM	March	Summer
69	231455	3118890	2019	8-12 AM	April	Summer
70	240293	3119928	2019	12-4 PM	August	Monsoon
71	232276	3132716	2019	8 PM-12 AM	July	Monsoon
72	233966	3134111	2019	8 PM-12 AM	March	Summer
73	231411	3134304	2019	12-4 PM	June	Summer
74	229769	3133369	2019	8-12 AM	November	Winter
75	231647	3131647	2019	8-12 AM	September	Monsoon
76	231585	3134838	2019	12-4 PM	April	Summer
77	232329	3135938	2019	8-12 AM	March	Summer
78	231680	3135994	2019	12-4 PM	December	Winter
79	231585	3136481	2019	8-12 AM	July	Monsoon
80	232249	3139719	2019	8-12 AM	May	Summer
81	229589	3138745	2019	12-4 AM	June	Summer
82	226969	3139236	2019	4-8 PM	January	Winter
83	228422	3139742	2019	4-8 PM	March	Summer
84	229576	3140361	2019	4-8 PM	April	Summer
85	238191	3134153	2019	8-12 AM	Feburary	Winter
86	238117	3133556	2019	12-4 PM	October	Monsoon
87	237809	3132939	2019	8 PM-12 AM	June	Summer
88	237321	3132426	2019	8 PM-12 AM	May	Summer
89	232075	3134098	2019	8-12 AM	April	Summer
90	231348	3134587	2019	8-12 AM	March	Summer
91	236004	3131099	2019	8 PM-12 AM	June	Summer
92	235705	3131231	2019	8 PM-12 AM	June	Summer
93	234497	3129769	2019	8 PM-12 AM	June	Summer
94	233867	3129081	2019	8 PM-12 AM	March	Summer
95	234452	3130014	2019	4-8 PM	November	Winter
96	234631	3130330	2019	4-8 PM	December	Winter
97	234652	3130070	2019	4-8 AM	August	Monsoon
98	234361	3130225	2019	12-4 PM	December	Winter
99	239272	3130083	2019	8 PM-12 AM	September	Monsoon
100	239753	3130177	2019	12-4 PM	August	Monsoon
101	239555	3129868	2019	4-8 AM	June	Summer
102	238000	3134580	2019	4-8 AM	March	Summer
103	771792	3146169	2019	8-12 AM	December	Winter
104	770217	3147717	2019	4-8 PM	Feburary	Winter
105	775639	3142554	2019	8-12 AM	May	Summer
106	775359	3139124	2019	4-8 PM	January	Winter
107	773815	3147701	2019	8-12 AM	April	Summer
108	776007	3147717	2019	8-12 AM	November	Winter
109	772022	3142429	2019	4-8 PM	June	Summer
110	776275	3142780	2019	4-8 AM	December	Winter
111	776790	3144089	2019	4-8 AM	November	Winter
112	776447	3145006	2019	4-8 PM	September	Monsoon
113	776905	3147162	2019	4-8 AM	May	Summer
114	777727	3148123	2019	8 PM-12 AM	June	Summer
115	778009	3148709	2019	4-8 PM	April	Summer
116	779041	3151937	2019	8 PM-12 AM	March	Summer
117	777961	3151801	2019	4-8 PM	August	Monsoon
118	777553	3151631	2019	8 PM-12 AM	October	Monsoon
119	776601	3151601	2019	12-4 PM	July	Monsoon
120	769850	3147173	2019	12-4 PM	October	Monsoon
121	769045	3147640	2019	12-4 PM	June	Summer
122	768577	3146976	2019	12-4 PM	May	Summer
123	768757	3148644	2019	8 PM-12 AM	May	Summer
124	775511	3141508	2019	4-8 PM	April	Summer
125	773314	3140595	2019	4-8 AM	March	Summer
126	773565	3141344	2019	8-12 AM	July	Monsoon
127	773210	3141163	2019	8 PM-12 AM	November	Winter
128	772659	3142228	2019	4-8 PM	December	Winter
129	772738	3141147	2019	4-8 PM	March	Summer
130	775416	3140146	2019	4-8 PM	April	Summer
131	773678	3139958	2019	12-4 PM	September	Monsoon
132	779855	3151533	2019	8 PM-12 AM	October	Monsoon
133	769720	3149353	2019	8 PM-12 AM	September	Monsoon
134	776464	3150060	2019	12-4 PM	June	Summer
135	232097	3137730	2019	12-4 PM	July	Monsoon
136	232067	3138164	2019	12-4 PM	July	Monsoon
137	231516	3138436	2019	4-8 PM	May	Summer
138	222509	3134259	2019	8 PM-12 AM	August	Monsoon
139	218562	3129620	2019	12-4 PM	June	Summer
140	217985	3128661	2019	4-8 PM	October	Monsoon
141	781388	3151598	2019	4-8 AM	December	Winter
142	768953	3140094	2019	12-4 PM	August	Monsoon
143	763367	3149268	2019	8 PM-12 AM	May	Summer
144	762486	3149588	2019	4-8 PM	Feburary	Winter
145	774475	3141856	2019	12-4 PM	January	Winter
146	212424	3133987	2019	8-12 AM	March	Summer
147	213123	3134203	2019	4-8 AM	December	Winter
148	213387	3133387	2019	12-4 PM	January	Winter
149	213647	3134169	2019	8-12 AM	September	Monsoon
150	213135	3134147	2019	12-4 PM	October	Monsoon
151	213103	3133929	2019	4-8 PM	December	Winter
152	214921	3147253	2019	8-12 AM	Feburary	Winter
153	216388	3142518	2019	12-4 PM	November	Winter
154	217839	3140610	2019	4-8 PM	September	Monsoon
155	215868	3129345	2019	8-12 AM	November	Winter
156	216117	3129260	2019	12-4 PM	December	Winter
157	221973	3127830	2019	12-4 PM	October	Monsoon
158	219949	3129856	2019	8-12 AM	January	Winter
159	218641	3128158	2019	4-8 AM	August	Monsoon
160	219480	3128935	2019	12-4 AM	November	Winter
161	216827	3147137	2019	4-8 PM	March	Summer
162	214391	3147994	2019	8-12 AM	December	Winter
163	218713	3124547	2019	8-12 AM	September	Monsoon
164	218880	3125496	2019	4-8 PM	October	Monsoon
165	212675	3132359	2019	4-8 PM	July	Monsoon
166	216452	3140247	2019	12-4 AM	June	Summer
167	216509	3140348	2019	4-8 PM	May	Summer
168	275879	3140377	2019	4-8 PM	June	Summer
169	787622	3137504	2019	12-4 AM	December	Winter
170	786926	3134882	2019	12-4 PM	July	Monsoon
171	781296	3137276	2019	8 PM-12 AM	Feburary	Winter
172	779851	3134780	2019	12-4 AM	March	Summer
173	769296	3139297	2019	4-8 PM	April	Summer
174	779181	3125684	2019	8-12 AM	April	Summer
175	784824	3137543	2019	4-8 PM	December	Winter
176	784121	3137438	2019	4-8 PM	August	Monsoon
177	784739	3136894	2019	4-8 AM	March	Summer
178	218333	3125505	2020	4-8 PM	May	Summer
179	218842	3125138	2020	8 PM-12 AM	June	Summer
180	216732	3140358	2020	4-8 PM	June	Summer
181	783044	3136307	2020	4-8 AM	September	Monsoon
182	778625	3133795	2020	4-8 PM	December	Winter
183	783939	3137556	2020	4-8 AM	October	Monsoon
184	783611	3137803	2020	4-8 PM	August	Monsoon
185	783598	3137255	2020	8-12 AM	November	Winter
186	783691	3138044	2020	8-12 AM	January	Winter
187	777858	3138443	2020	4-8 PM	March	Summer
188	782232	3141988	2020	8-12 AM	March	Summer
189	779806	3135281	2020	4-8 PM	Feburary	Winter
190	784544	3137566	2020	8 PM-12 AM	May	Summer
191	793842	3140008	2020	4-8 PM	December	Winter
192	206567	3141483	2020	4-8 PM	September	Monsoon
193	782658	3143382	2020	4-8 PM	Feburary	Winter
194	782630	3144883	2020	4-8 PM	November	Winter
195	782939	3145047	2020	4-8 AM	April	Summer
196	779111	3134619	2020	4-8 AM	May	Summer
197	742473	3139746	2020	4-8 AM	December	Winter
198	750181	3137937	2020	4-8 PM	Feburary	Winter
199	738273	3139545	2020	4-8 AM	January	Winter
200	738270	3141005	2020	12-4 AM	November	Winter
201	738667	3143313	2020	8 PM-12 AM	December	Winter
202	735697	3146053	2020	4-8 PM	Feburary	Winter
203	734375	3145439	2020	4-8 AM	December	Winter
204	731525	31452974	2020	4-8 PM	January	Winter
205	790450	3123930	2020	4-8 PM	January	Winter
206	211437	3119622	2020	12-4 AM	June	Summer
207	212106	3119517	2020	4-8 PM	June	Summer
208	792282	3127367	2020	12-4 AM	January	Winter
209	778198	3132329	2020	12-4 AM	June	Summer
210	781302	3131713	2020	4-8 PM	January	Winter
211	220054	3113969	2020	4-8 PM	May	Summer
212	220016	3114128	2020	12-4 AM	March	Summer
213	215997	3118133	2020	4-8 PM	November	Winter
214	217280	3118040	2020	4-8 PM	December	Winter
215	218932	3118143	2020	4-8 PM	March	Summer
216	242413	3124451	2020	8 PM-12 AM	Feburary	Winter
217	243482	3125535	2020	12-4 AM	January	Winter
218	242844	3125916	2020	4-8 PM	May	Summer
219	241854	3126550	2020	4-8 PM	December	Winter
220	228245	3118290	2020	12-4 AM	March	Summer
221	233555	3125949	2020	8 PM-12 AM	November	Winter
222	241854	3123737	2020	4-8 PM	December	Winter
223	248271	3122448	2020	8 PM-12 AM	June	Summer
224	247486	3119543	2020	4-8 PM	January	Winter
225	239568	3120939	2020	4-8 PM	December	Winter
226	254398	3109423	2020	4-8 AM	April	Summer
227	242185	3127335	2020	4-8 AM	Feburary	Winter
228	243451	3124731	2020	8 PM-12 AM	January	Winter
229	210016	3117271	2020	4-8 PM	December	Winter
230	209127	3117584	2020	8 PM-12 AM	November	Winter
231	217320	3117906	2020	8 PM-12 AM	May	Summer
232	216907	3117929	2020	4-8 PM	November	Winter
233	216199	3118684	2020	8 PM-12 AM	November	Winter
234	782026	3127278	2020	4-8 PM	December	Winter
235	781621	3127674	2020	8-12 AM	June	Summer
236	792769	3130066	2020	8-12 AM	January	Winter
237	216594	3113354	2020	4-8 AM	December	Winter
238	778654	3132570	2020	4-8 PM	December	Winter
239	212845	3124457	2020	8 PM-12 AM	April	Summer
240	782559	3128222	2020	8 PM-12 AM	October	Monsoon
241	787641	3123813	2020	4-8 PM	Feburary	Winter
242	787461	3132081	2020	4-8 AM	December	Winter
243	778239	3132940	2020	4-8 AM	November	Winter
244	211625	3124827	2020	4-8 PM	December	Winter
245	217076	3116450	2020	8 PM-12 AM	May	Summer
246	216730	3115299	2020	8-12 AM	December	Winter
247	792320	3131110	2020	8 PM-12 AM	May	Summer
248	783733	3126695	2020	4-8 PM	Feburary	Winter
249	214166	3120701	2020	4-8 AM	January	Winter
250	214333	3124700	2020	8 PM-12 AM	November	Winter
251	792775	3129994	2020	4-8 PM	March	Summer
252	211361	3118443	2020	4-8 PM	Feburary	Winter
253	785765	3121891	2020	4-8 PM	May	Summer
254	215072	3116246	2020	4-8 PM	November	Winter
255	247204	3124126	2020	4-8 PM	July	Monsoon
256	241981	3126200	2020	4-8 PM	June	Summer
257	759178	3142689	2020	4-8 PM	June	Summer
258	746015	3136371	2020	4-8 PM	January	Winter
259	749040	3137631	2020	4-8 PM	March	Summer
260	734089	3145412	2020	4-8 PM	December	Winter
261	742945	3138086	2020	12-4 AM	December	Winter
262	747308	3137054	2020	12-4 AM	March	Summer
263	745931	3158406	2020	12-4 AM	July	Monsoon
264	716320	3156464	2020	8 PM-12 AM	July	Monsoon
265	735406	3143578	2020	4-8 PM	November	Winter
266	749722	3135162	2020	4-8 PM	November	Winter
267	725672	3152492	2020	4-8 PM	May	Summer
268	731399	3141891	2020	8-12 AM	July	Monsoon
269	747006	3149038	2020	4-8 PM	Feburary	Winter
270	740086	3142032	2020	12-4 AM	November	Winter
271	740636	3142350	2020	8 PM-12 AM	December	Winter
272	740905	3141993	2020	4-8 AM	January	Winter
273	741186	3141848	2020	4-8 PM	April	Summer
274	742277	3141665	2020	12-4 AM	June	Summer
275	738026	3143560	2020	8-12 AM	January	Winter

## Sheet: Sheet2
1
2
3
4
5	M
6
7
8
9
10
11
12
13
14
15
16
17
18
19
20
21
22
23
24
25
26
27
28
29
30
31
32
33
34
35
36
37
38
39
40
41
42
43
44
45
46
47
48
49
50
51
52
53
54
55
56
57
58
59
60
61
62
63
64
65
66
67
68
69
70
71
72
73
74
75
76
77
78
79
80
81
82
83
84
85
86
87
88
89
90
91
92
93
94
95
96
97
98
99
100
101
102
103
104
105
106
107
108
109
110
111
112
113
114
115
116
117
118
119
120
121
122
123
124
125
126
127
128
129
130
131
132
133
134
135
136
137
138
139
140
141
142
143
144
145
146
147
148
149
150
151
152
153
154
155
156
157
158
159
160
161
162
163
164
165
166
167
168
169
170
171
172
173
174
175
176
177
178
179
180
181
182
183
184
185
186
187
188
189
190
191
192
193
194
195
196
197
198
199
200
201
202
203
204
205
206
207
208
209
210
211
212
213
214
215
216
217
218
219
220
221
222
223
224
225
226
227
228
229
230
231
232
233
234
235
236
237
238
239
240
241
242
243
244
245
246
247
248
249
250
251
252
253
254
255
256
257
258
259
260
261
262
263
264
265
266
267
268
269
270
271
272
273
274
275
